# Supplementary material for: Do Web-Based Interventions Improve Well-Being in Type 2 Diabetes? A Systematic Review and Meta-Analysis
Source: PubMed Central journal article supplement (PMC5097175; doi:10.2196/jmir.5991), 2016-10-21
Supplement: jmir_v18i10e270_app1.pdf [file jmir_v18i10e270_app1.pdf]

## APPENDIX 1

Database: Ovid MEDLINE(R) In-Process & Other Non-Indexed Citations and Ovid MEDLINE(R) <1946 to Present>  
Search Strategy:

- 
- 1 exp diabetes mellitus, Type 2/ (94839)
  - 2 (diabet\* adj3 type adj "2").ab,ti. (4255)
  - 3 T2DM.ab,ti. (8768)
  - 4 T2D.ab,ti. (3691)
  - 5 NIDDM.ab,ti. (6859)
  - 6 (diabet\* adj3 type adj ii).ab,ti. (945)
  - 7 (non-insulin-dependent adj2 diabet\*).ab,ti. (10016)
  - 8 (adult-onset adj2 diabet\*).ab,ti. (518)
  - 9 1 or 2 or 3 or 4 or 5 or 6 or 7 or 8 (103718)
  - 10 (computer-assist\* or computer-based or web-based or online-based).mp. [mp=title, abstract, original title, name of substance word, subject heading word, keyword heading word, protocol supplementary concept word, rare disease supplementary concept word, unique identifier] (278055)
  - 11 (computer\* or telecommunication\*).mp. [mp=title, abstract, original title, name of substance word, subject heading word, keyword heading word, protocol supplementary concept word, rare disease supplementary concept word, unique identifier] (654788)
  - 12 (interactive or online or on-line or telemedicin\*).mp. [mp=title, abstract, original title, name of substance word, subject heading word, keyword heading word, protocol supplementary concept word, rare disease supplementary concept word, unique identifier] (120421)
  - 13 (world wide web or worldwide web or website\*).mp. [mp=title, abstract, original title, name of substance word, subject heading word, keyword heading word, protocol supplementary concept word, rare disease supplementary concept word, unique identifier] (16772)
  - 14 electronic health\*.mp. (13124)
  - 15 e-health.mp. (1373)
  - 16 telehealth.mp. (2074)
  - 17 Internet/ or internet.mp. (71746)
  - 18 web\*.mp. (86911)
  - 19 technol\*.mp. (352646)
  - 20 10 or 11 or 12 or 13 or 14 or 15 or 16 or 17 or 18 or 19 (1144579)
  - 21 9 and 20 (3201)
  - 22 limit 21 to (humans and yr="1995 -Current" and randomized controlled trial and last 20 years) (376)
