# Supplementary material for: Do Web-Based Interventions Improve Well-Being in Type 2 Diabetes? A Systematic Review and Meta-Analysis
Source: PubMed Central journal article supplement (PMC5097175; doi:10.2196/jmir.5991), 2016-10-21
Supplement: jmir_v18i10e270_app2.pdf [file jmir_v18i10e270_app2.pdf]

Appendix 4: Description of intervention and control groups per study

| First author (year)  | Conditions/Assessments                                                                                                                                                                                                                                                            |
|----------------------|-----------------------------------------------------------------------------------------------------------------------------------------------------------------------------------------------------------------------------------------------------------------------------------|
| Bond (2010)          | T1: web-based interventions + usual care<br>C: Usual care                                                                                                                                                                                                                         |
| Tang (2013)          | T1: PHCP (online disease management system) – glucometer and patient dashboard<br>C: NR                                                                                                                                                                                           |
| Heisler (2014)       | T1: 1- to 2- hour sessions with a community health worker (iDecide)<br>C: 1- to 2- hour sessions with a community health worker (hardcopy)                                                                                                                                        |
| Glasgow (2012)       | T1: Internet based computer assisted self-management (CASM)<br>T2: CASM + enhanced social support<br>C: Enhanced usual care, computer-based feedback + recommendations minus key intervention procedures.                                                                         |
| McMahon (2012)       | T1: Online care management with asynchronous online communication and data sharing.<br>T2: Telephone- based care<br>T3: Usual care with computer use and internet access.<br>C: N/A                                                                                               |
| McKay (2001)         | T1: eight week. D-Net Active Lives PA intervention<br>C: eight week. Internet-Information only. Access to diabetes-related articles in the web-site library. BG tracking                                                                                                          |
| McKay (2002)         | T1: Internet-based peer support<br>T2: Personalised self-management coach<br>T3: Combined condition<br>C: Information only                                                                                                                                                        |
| Lorig (2010)         | T1: Program (six weekly sessions)<br>T2: Program + email reinforcement<br>C: Usual care                                                                                                                                                                                           |
| Nobis (2015)         | T1: six consecutive sessions: guided self-help brief online unguided psycho-education intervention to reduce depression<br>C: Access to an online psychoeducational program, based on the German S3-Guidance/National Disease Management Guideline for Unipolar Depression.       |
| Van Bastelaar (2011) | T1: eight consecutive lessons (written/verbal information)<br>C: 12 week waiting list. Completed measurements 8+12 weeks after randomisation. After waiting period, they had access to intervention.                                                                              |
| Fisher (2013)        | T1: 40min validated Internet-based computer assisted self-management program (CASM)<br>T2: CASM + PST (CAPS)<br>C: Computer minimal support                                                                                                                                       |
| Wangberg (2008)      | T1: Online intervention in self-care with low SE (LSE)<br>T2: Online intervention in self-care with high SE (HSE)                                                                                                                                                                 |
| Hunt (2014)          | T1: iPad (app called 'Diabetes Buddy')<br>C: journal                                                                                                                                                                                                                              |
| Smith (2000)         | T1: 5 month computer-intervention (software First Class)<br>C: No computer                                                                                                                                                                                                        |
| Pacaud (2012)        | T1: Web static (electronic education, virtual appointments with asynchronous communication)<br>T2: Web interactive (electronic education, virtual appointments with asynchronous/synchronous communication)<br>C: Face-to-face education, synchronous/asynchronous communication. |
| Fonda (2009)         | T1: 12 month web-based                                                                                                                                                                                                                                                            |

---

C: Usual care

---
