# Supplementary material for: Do Web-Based Interventions Improve Well-Being in Type 2 Diabetes? A Systematic Review and Meta-Analysis
Source: PubMed Central journal article supplement (PMC5097175; doi:10.2196/jmir.5991), 2016-10-21
Supplement: jmir_v18i10e270_app3.pdf [file jmir_v18i10e270_app3.pdf]

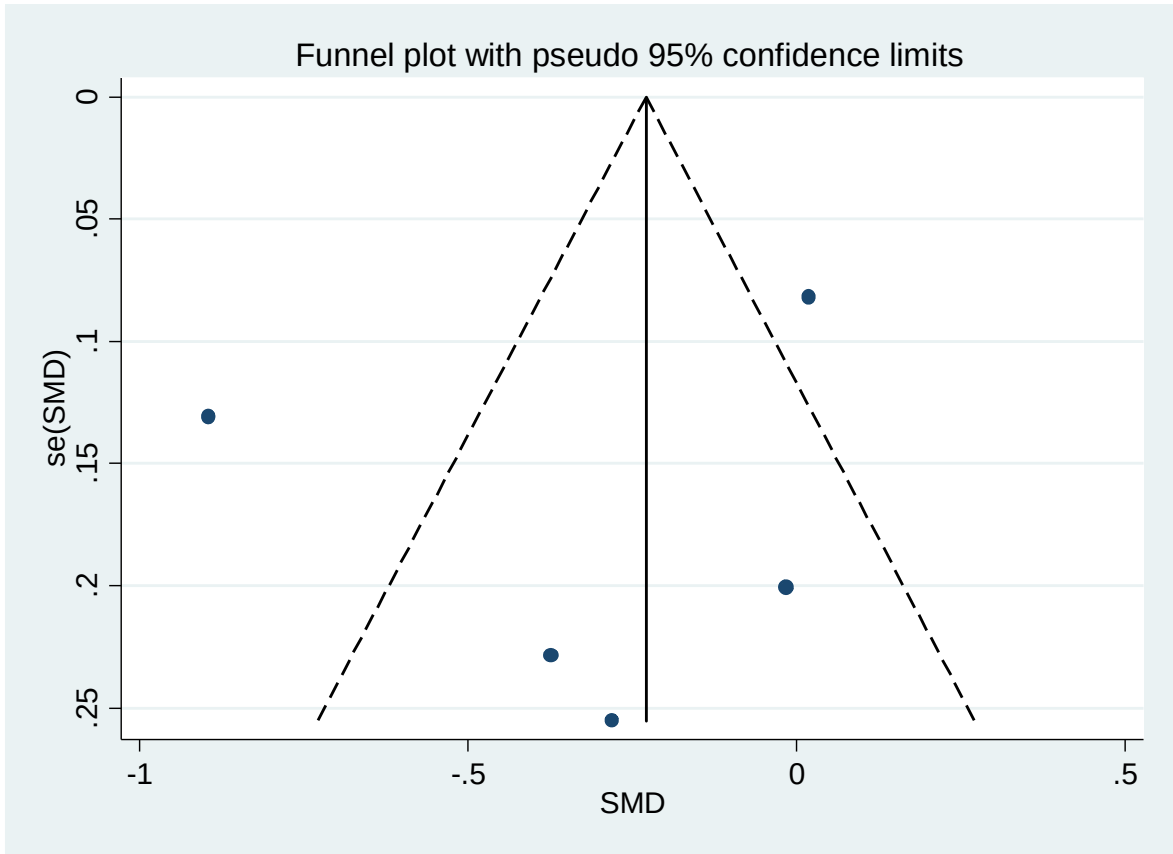

Multimedia Appendix 2: Funnel plot for depression
